# Supplementary material for: Peripheral-specific Y1 receptor antagonism increases thermogenesis and protects against diet-induced obesity
Source: PubMed Central journal article supplement (PMC8113522; doi:10.1038/s41467-021-22925-3), 2021-05-11
Supplement: 41467_2021_22925_MOESM1_ESM.pdf [file 41467_2021_22925_MOESM1_ESM.pdf]

**Supplementary information to manuscript entitled “Peripheral-specific Y1 receptor antagonism increases thermogenesis and protects against diet-induced obesity” by Yan et al. Nature Communications 2021**

**Supplementary Table 1.** Basic characteristics of lean and obese subjects

|                | Men | Women | Age<br>(Years) | BMI<br>(kg/m <sup>2</sup> ) | HR<br>(bpm) | BP<br>(mmHg) | TG<br>(mmol/L) | TC<br>(mmol/L) |
|----------------|-----|-------|----------------|-----------------------------|-------------|--------------|----------------|----------------|
| Lean subjects  | 6   | 5     | 39.72±11.76    | 20.75±1.98                  | 75.5±11     | 120±8/75±7   | 0.99±0.28      | 3.88±0.85      |
| Obese subjects | 8   | 8     | 34.75±8.86     | 41.52±7.55                  | 87.4±9      | 132±15/83±13 | 2.25±0.91      | 4.99±1.47      |

**Supplementary Table 2.** Sequences of oligonucleotide primers (5'-3') used in real time PCR  
in humans

| <b>Gene symbol</b>             | <b>5' Oligonucleotide</b> | <b>3' Oligonucleotide</b> |
|--------------------------------|---------------------------|---------------------------|
| <i>NPY</i>                     | CGCTGCGACACTACATCAAC      | CTCTGGGCTGGATCGTTTTCC     |
| <i>UCP1</i>                    | GATCACCTTCCCGCTGGACA      | AGCTGATTTGCCGCTGAAGC      |
| <i>PGC1<math>\alpha</math></i> | ACCACAAACGATGACCCTCC      | GCCTGCAGTTCCAGAGAGTT      |
| <i>Cidea</i>                   | CTTGGGAGACAACACGCATTT     | TCTCGCTATTCCCGACCTCTT     |
| <i>CD137</i>                   | TTGGATGGAAAGTCTGTGCTTG    | AGGAGATGATCTGCGGAGAGT     |
| <i>Tmem26</i>                  | TTTGCCAGTACAGTGCCGAT      | ACCACCAAGCGGTAGAGTTG      |
| <i>Adiponectin</i>             | GACCAGGAAACCACGACTCA      | TAGGCAAAGTAGTACAGCCCA     |
| <i>PPAR<math>\gamma</math></i> | TACTGTTCGGTTTCAGAAATGCC   | GTCAGCGGACTCTGGATTCAG     |
| <i>NPYR1(Y1R)</i>              | GAGGCGATGTGTAAGTTGAATCC   | TGGAACGGCTCATCAGTCATT     |
| <i>NPYR2(Y2R)</i>              | CATCTTGCTTGGGGTAATTGGC    | AGAGTGAACGGTAGACACAGAG    |
| <i>NPYR4(Y4R)</i>              | TCCAGTGCATGTCGGTGAC       | ACACAGGCAATGACCCAGATG     |
| <i>NPYR5(Y5R)</i>              | GCTGGATCAGTGGATGTTTGG     | CAGATGGCAAACCTAGTGTCC     |

**Supplementary Table 3.** Sequences of oligonucleotide primers (5'-3') used in real-time PCR in mice

| <b>Gene symbol</b>             | <b>5' Oligonucleotide</b>  | <b>3' Oligonucleotide</b> |
|--------------------------------|----------------------------|---------------------------|
| <i>NPYR1(Y1R)</i>              | CACAGGCTGTCTTACACG         | GCGAATGTATATCTTGAAGTAG    |
| <i>NPYR2(Y2R)</i>              | CACCAAATCGGACCTGCT         | AGAACCAGTTCACTCTCACTTGG   |
| <i>NPYR4(Y4R)</i>              | CTCCTCACCTGGGACGTG         | TCCAGGAGTAAAGGGCCTACT     |
| <i>NPYR5(Y5R)</i>              | GAGAAGCCCACGTCCCTATC       | AGAGTCCCTCTTGGAAACCAC     |
| <i>UCP1</i>                    | GGCCTCTACGACTCAGTCCA       | TAAGCCGGCTGAGATCTTGT      |
| <i>PGC1<math>\alpha</math></i> | CAGTCGCAACATGCTCAAG        | GGGTCATTTGGTGACTCTGG      |
| <i>PRDM16</i>                  | CCTAAGGTGTGCCAGCA          | CACCTTCCGCTTTTCTACCC      |
| <i>DIO2</i>                    | CTGCGCTGTGTCTGGAAC         | GGAGCATCTTCACCCAGTTT      |
| <i>Tbx1</i>                    | TTTGTGCCCGTAGATGACAA       | CTCGGCCAGGTGTAGCAG        |
| <i>Cox7a1</i>                  | CGAAGAGGGGAGGTGACTC        | AGCCTGGGAGACCCGTAG        |
| <i>NRG4</i>                    | TGATTTTCAACCTTAATTCTTCCAT  | CCCCCATTGAGGCAAAAT        |
| <i>CIDEA</i>                   | CTCCGAGTACTGGGCGATAC       | ACCAGCCTTTGGTGCTAGG       |
| <i>EVA1</i>                    | TGTGCTTCCACTTCTCCTGA       | TCCACAGCTTCTGTAGGACAAA    |
| <i>Slc27a1</i>                 | GACAAGCTGGATCAGGCAAG       | GAGGCCACAGAGGCTGTTC       |
| <i>Acot2</i>                   | GGAACCGAGGGCTGAAGT         | GCTCTCAGGACAGCGAAAGA      |
| <i>Tmem26</i>                  | GTGTTTCAATAAAGTATTTGGACAGC | TTAAGCCAGATTTTGGACAGG     |
| <i>PDK4</i>                    | TCAAGATTTCTGACCGAGGAG      | TGTA ACTAAAGAGGCGGTCAGTAA |
| <i>Slc29a1</i>                 | CCTGCAGCTCAACCTTGC         | CTTCCTTTTGGCTCCTCTCTT     |
| <i>Klhl13</i>                  | GTGGCCAGAGCTTTCACAG        | GCCTTAGGCCACAGCTAATAGA    |
| <i>FBXO31</i>                  | TGGCTTGCTTAGATCTTGGAC      | GCTCCTAGCAACCAGGACAG      |
| <i>Ebf3</i>                    | GCACAACAATTCCAAACACG       | GGGGCCGTACCTTCTGAC        |
| <i>CD137</i>                   | GGCCTTCCAGTCCACCAT         | GTCCAGGAGTCATGCAGAGG      |
| <i>IRF4</i>                    | AGCACCTTATGGCTCTCTGC       | TGACTGGTCAGGGGCATAAT      |

|                                |                          |                        |
|--------------------------------|--------------------------|------------------------|
| <i>PPAR<math>\gamma</math></i> | GAAAGACAACGGACAAATCACC   | GGGGGTGATATGTTTGAAGTTG |
| <i>Adiponectin</i>             | GGAGAGAAAGGAGATGCAGGT    | CTTTCCTGCCAGGGGTTC     |
| <i><math>\beta</math>3R</i>    | CAGCCAGCCCTGTTGAAG       | CCTTCATAGCCATCAAACCTG  |
| <i>NRG4</i>                    | TGATTTTCAACCTTAATTCTTCAT | CCCCCATTGAGGCAAAAT     |
| <i>RPL19</i>                   | CTCGTTGCCGAAAAACA        | TCATCCAGGTCACCTTCTCA   |

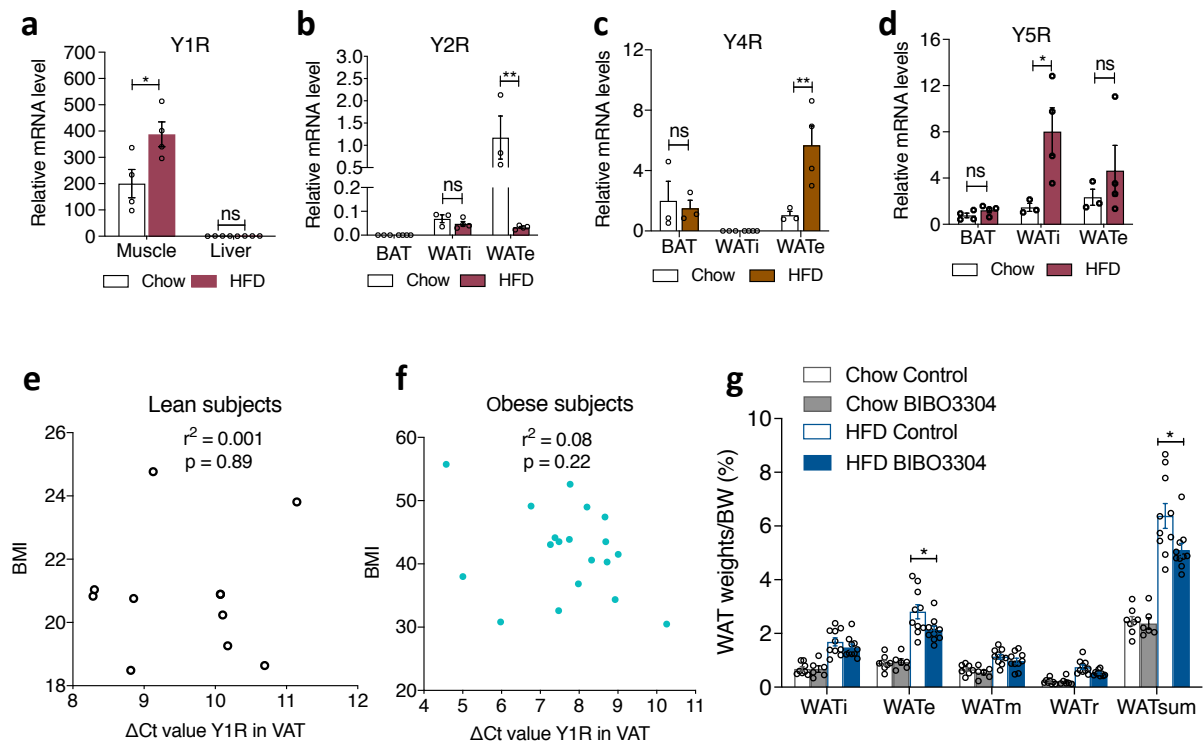

**Supplementary Fig 1:** mRNA expression profile of other NPY receptors in mice and human adipose tissues. **a**, *Y1R* mRNA expression in muscle and liver; **b**, *Y2R* mRNA expression, **c**, *Y4R* mRNA expression, **d**, *Y5R* mRNA expression in BAT, WATi and WATe of wild type mice fed a standard chow diet (open bar) or a HFD (filled bar) for 7 weeks. Data are mean  $\pm$  s.e.m.  $n = 3-4$  per group. \* $p < 0.05$ ; \*\* $p < 0.01$ , two-tailed t test within the same tissue type. ns, non-significance. **e**, **f**, Correlation between BMI ( $\text{kg}/\text{m}^2$ ) and  $\Delta$ Ct values of *Y1R* mRNA expression in visceral adipose tissue (VAT) of lean subjects (left) and obese subjects (right). Data are mean  $\pm$  s.e.m.  $n = 11$  in lean individuals and  $n = 16$  in obese individuals.  $p$  values by two-tailed Pearson Correlation analysis. **g**, Dissected white adipose tissue weights expressed as a percent of body weight of chow- or HFD-fed WT mice treated with control (open bar) or BIBO3304 (filled bar) for 7 weeks. Data are mean  $\pm$  s.e.m, chow  $n = 6$  (grey, control: open grey; BIBO3304: grey), HFD  $n = 8$  (control: open blue; BIBO3304: blue), \* $p < 0.05$ , two-way ANOVA with Sidak's multiple comparisons test. Source data are provided as a Source Data file.

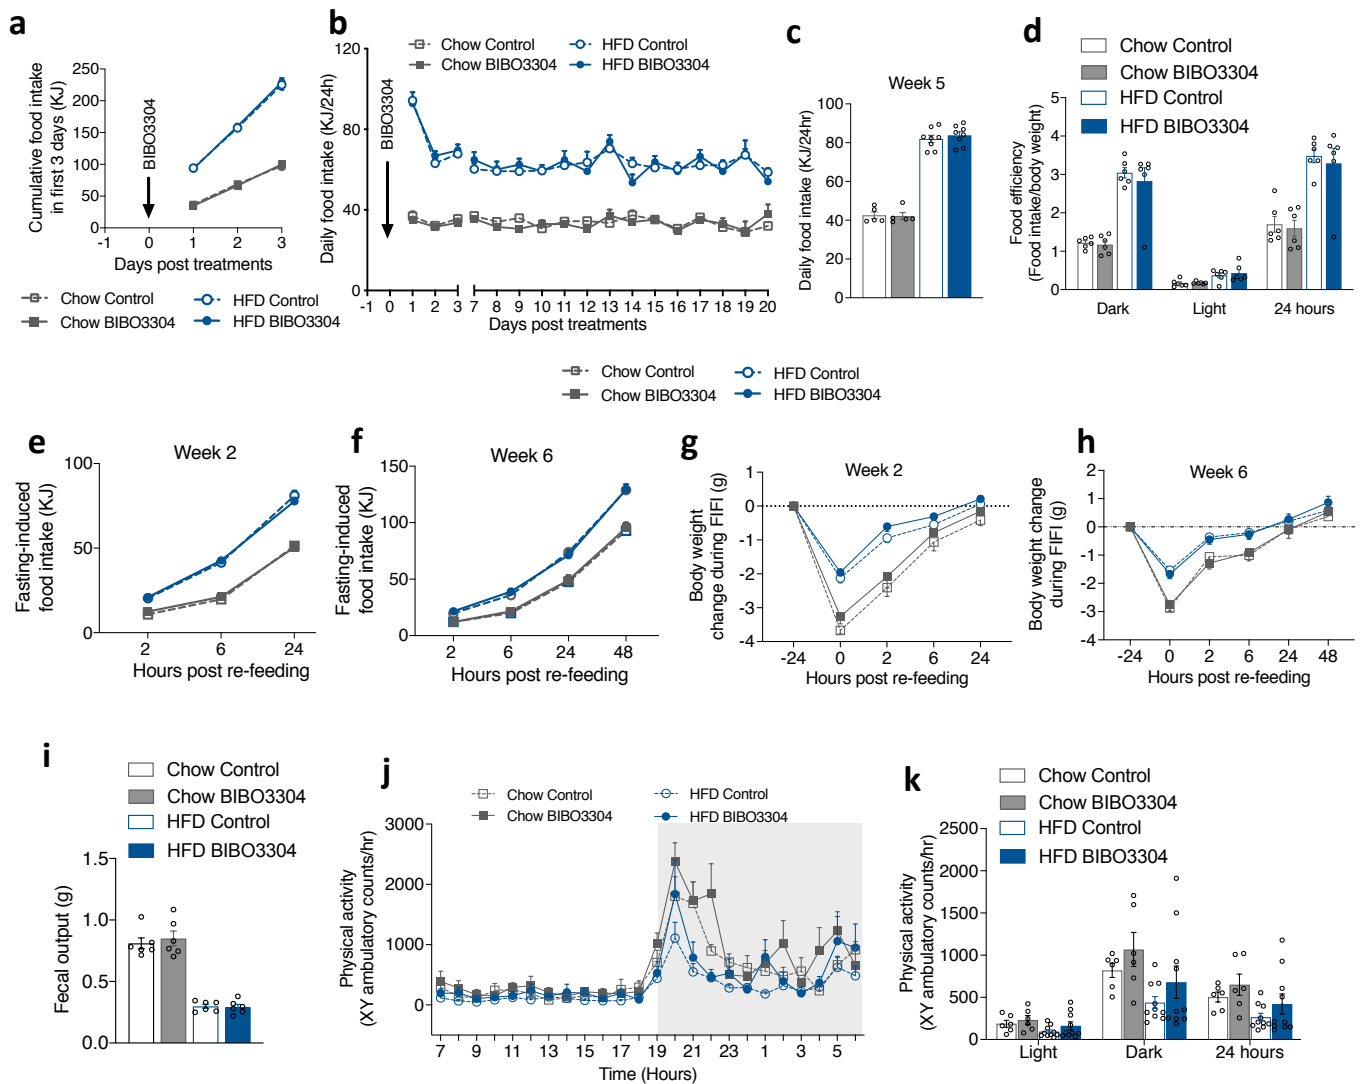

**Supplementary Fig. 2: Effect of peripheral Y1R antagonism on food intake and energy expenditure in wild type mice.** **a**, Cumulative food intake of chow- and HFD-fed WT mice treated with a vehicle or BIBO3304 containing jelly in first 3 days. **b**, Daily food intake of chow- and HFD-fed WT mice treated with a vehicle or BIBO3304 containing jelly from day 1 to day 20 post treatment. **c**, Food intake of chow- and HFD-fed WT mice treated with a vehicle or BIBO3304 containing jelly at week 5 post treatment. Data are mean  $\pm$  s.e.m, chow  $n = 5$  (control: open grey; BIBO3304: grey), HFD  $n = 8$  (control: open blue; BIBO3304: blue),  $p$  values by repeated measures ANOVA (**a**, **b**) or two-way ANOVA (**c**). **d**, Food efficiency was calculated during the dark phase, light phase and over a 24-h period.  $p$  value by two-tailed t-test within the same adipose depot. Data are mean  $\pm$  s.e.m,  $n = 6$  per group,  $p$  values by two-way ANOVA with Sidak's multiple comparisons test. **e**, **f**, Fast-induced food intake performed at week 2 and week 6 post BIBO3304 treatment. **g**, **h**, Weight recovery after the fast-induced food intake at week 2 and week 6 in **e**, **f**. Data are mean  $\pm$  s.e.m, chow  $n = 6$  (grey, control: open square; BIBO3304: filled square), HFD  $n = 8$  (blue, control: open circle; BIBO3304: filled circle),  $p$  values by two-way repeated measures ANOVA (**e**, **f**, **g**, **h**). **i**, Fecal output of chow- and HFD-fed mice treated with vehicle or BIBO3304 for 7 weeks. Data are mean  $\pm$  s.e.m, chow  $n = 6$ , HFD  $n = 8$ ,  $p$  values by two-way ANOVA with Sidak's multiple comparisons test. **j**, Physical activity over a 24h course, with **k** showing average physical activity during the light phase, dark phase and over a 24 h period from **j**. Data are mean  $\pm$  s.e.m, chow  $n = 6$ , HFD  $n = 8$ ,  $p$  values by two-way repeated measures ANOVA with Sidak's multiple comparisons test. Source data are provided as a Source Data file.

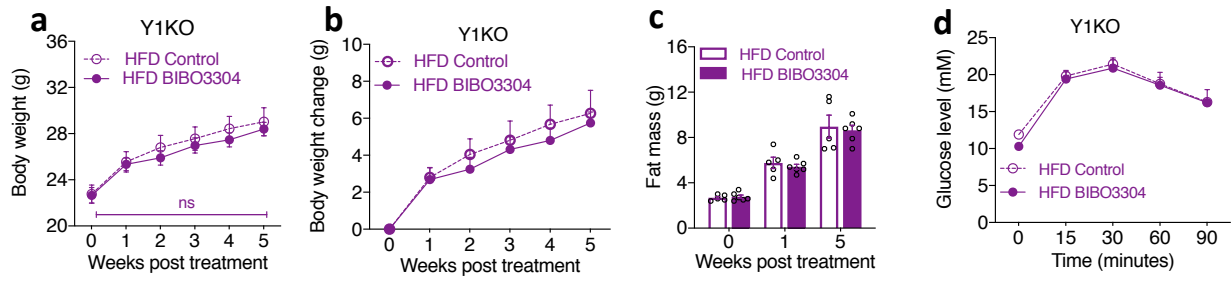

**Supplementary Fig. 3:** Y1R signalling is critical for BIBO3304-induced thermogenic effects. BIBO3304-treated HFD-fed Y1R<sup>-/-</sup> mice displayed no difference from control treated Y1R<sup>-/-</sup> mice with regards to (a) body weight, (b) body weight change (control: open circle; BIBO3304: filled circle), (c) whole-body fat mass (control: open bar; BIBO3304: filled bar) and (d) glucose tolerance test. Data are mean ± s.e.m, n = 4 -6 per group. *p* values by two-way ANOVA or repeated measures (a, b, d) with Sidak's multiple comparisons test, two-sided *t* test for fat mass (c). ns, non-significance. Source data are provided as a Source Data file.

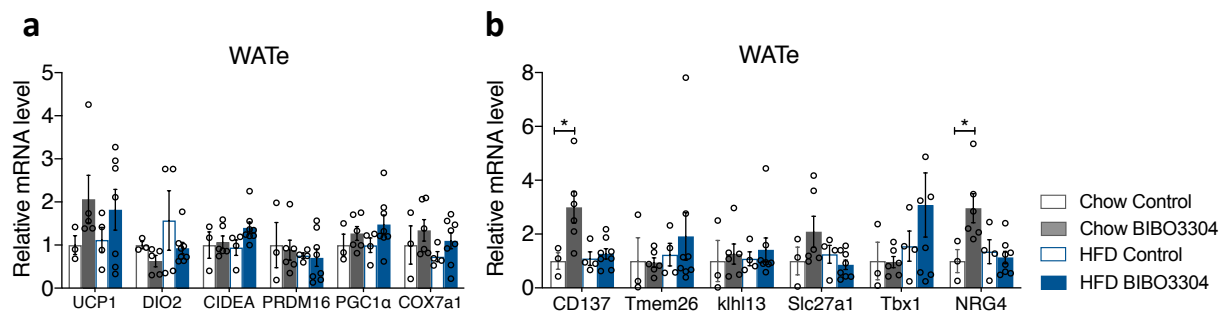

**Supplementary Fig. 4:** mRNA expression of BAT-specific and beige-selective genes in epididymal white adipose tissue (WATe) was unaffected by BIBO3304 treatment. **a**, mRNA levels of thermogenic markers in WATe. **b**, mRNA levels of beige adipocyte-related genes in WATe of chow- and HFD-fed wild type mice on a daily administration with a jelly containing a vehicle or BIBO3304. Data are mean  $\pm$  s.e.m, chow  $n = 3 - 6$  (control: open grey; BIBO3304: grey), HFD  $n = 4 - 8$  (control: open blue; BIBO3304: blue). \* $p < 0.05$ , two-way ANOVA with Sidak's multiple comparisons test. Source data are provided as a Source Data file.



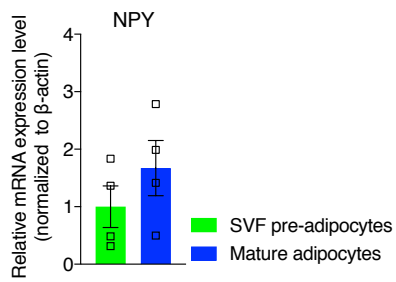

**Supplementary Fig. 5.** NPY mRNA expression in human SVF pre-adipocytes and mature adipocytes. Data are mean  $\pm$  s.e.m,  $n = 4$  subjects per group (pre-adipocytes: bright green; mature adipocyte: blue).  $p$  values by two-sided unpaired t test. Source data are provided as a Source Data file.

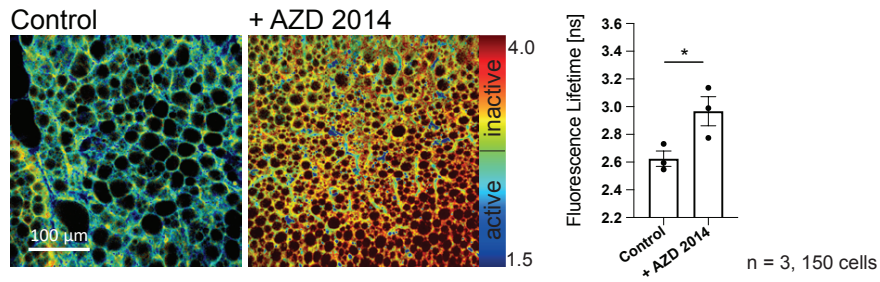

**Supplementary Fig. 6.** Akt activity in brown adipose tissue was blocked by specific Akt inhibitor in Akt-FRET biosensor mice. Brown adipose tissue (BAT) isolated from chow-fed Akt-FRET biosensor mice was treated *ex vivo* with 500 nM AZD2014 (a mTOR1/2 inhibitor) for 30 minutes and Akt activity quantified, revealing effective inhibition of Akt in this tissue. Data are mean ± s.e.m. n = 3 mice per group, 150 cells; \* $p < 0.05$ , two-tailed unpaired *t* test. Source data are provided as a Source Data file.
